# Supplementary material
Source: publisher site journal article supplement (https://www.dovepress.com/article/160469)

## Supplementary materials

Search strategies for Pubmed, Embase, The Cochrane Library, Wanfang, CNKI, VIP and CBM database

Pubmed

1. "Nasopharyngeal Neoplasms"[Mesh]
2. "Nasopharynx"[Mesh]
3. Nasopharynx[Title/Abstract]
4. Nasopharyngeal[Title/Abstract]
5. Rhinopharynxes[Title/Abstract]
6. Rhinopharynges[Title/Abstract]
7. Rhinopharynx[Title/Abstract]
8. Nasopharynges[Title/Abstract]
9. Nasopharynxes[Title/Abstract]
10. 2 or 3 or 4 or 5 or 6 or 7 or 8 or 9
11. "Neoplasms"[Mesh]
12. Neoplasm[Title/Abstract]
13. Neoplasms[Title/Abstract]
14. Cancer[Title/Abstract]

15. Cancers[Title/Abstract]
16. Tumor[Title/Abstract]
17. Tumors[Title/Abstract]
18. Carcinomas[Title/Abstract]
19. Carcinoma[Title/Abstract]
20. Malignancy[Title/Abstract]
21. Malignancies[Title/Abstract]
22. 11 or 12 or 13 or 14 or 15 or 16 or 17 or 18 or 19 or 20 or 21
23. 10 and 22
24. NPC[Title/Abstract]
25. 1 or 23 or 24
26. "Radiotherapy"[Mesh]
27. Radiotherapies[Title/Abstract]
28. Radiotherapy[Title/Abstract]
29. RT[Title/Abstract]
30. Radiation[Title/Abstract]
31. 26 or 27 or 28 or 29 or 30
32. "Radiotherapy, Intensity-Modulated"[Mesh]

33. Intensity-Modulated
34. Intensity Modulated
35. Volumetric-Modulated
36. Volumetric Modulated
37. Tomotherapy
38. Tomotherapies
39. IMRT
40. 32 or 33 or 34 or 35 or 36 or 37 or 38 or 39 or 40
41. 31 and 40
42. "Chemoradiotherapy"[Mesh]
43. Chemoradiotherapies[Title/Abstract]
44. Chemoradiotherapy[Title/Abstract]
45. Radiochemotherapy[Title/Abstract]
46. Radiochemotherapies[Title/Abstract]
47. 42 or 43 or 44 or 45 or 46
48. "Drug Therapy"[Mesh]
49. Drug Therapies[Title/Abstract]
50. Drug Therapy[Title/Abstract]

51. Chemotherapy[Title/Abstract]
52. Chemotherapies[Title/Abstract]
53. Pharmacotherapy[Title/Abstract]
54. Pharmacotherapies[Title/Abstract]
55. 48 or 49 or 50 or 51 or 52 or 53 or 54
56. 47 or 55
57. randomized controlled trial[Publication Type]
58. randomized[Title/Abstract]
59. placebo[Title/Abstract]
60. 57 or 58 or 59
61. 25 and 42 and 56 and 60

Embase

#1 'nasopharynx tumor'/exp

#2 'nasopharynx'/exp

#3 'nasopharyngeal':ab,ti

#4 'nasopharynx':ab,ti

#5 'rhinopharynxes':ab,ti

#6 'rhinopharynges':ab,ti

#7 'rhinopharynx':ab,ti

#8 'nasopharynges':ab,ti

#9 'nasopharynxes':ab,ti

#10 #2 OR #3 OR #4 OR #5 OR #6 OR #7 OR #8 OR #9

#11 'neoplasm'/exp

#12 'neoplasm':ab,ti

#13 'neoplasms':ab,ti

#14 'cancer':ab,ti

#15 'cancers':ab,ti

#16 'tumor':ab,ti

#17 'tumors':ab,ti

#18 'carcinomas':ab,ti

#19 'carcinoma':ab,ti

#20 'malignancy':ab,ti

#21 'malignancies':ab,ti

#22 #11 OR #12 OR #13 OR #14 OR #15 OR #16 OR #17 OR #18 OR #19 OR #20 OR

#21

#23 #10 AND #22

#24 'npc':ab,ti

#25 #1 OR #23 OR #24

#26 'radiotherapy'/exp

#27 'radiotherapies':ab,ti

#28 'radiotherapy':ab,ti

#29 'radiation':ab,ti

#30 'rt':ab,ti

#31 #26 OR #27 OR #28 OR #27 OR #30

#32 'intensity modulated radiation therapy'/exp

#33 'volumetric-modulated'

#34 'volumetric modulated'

#35 'intensity-modulated'

#36 'intensity modulated'

#37 'tomotherapy'

#38 'tomotherapies'

#39 'imrt'

#40 #32 OR #33 OR #34 OR #35 OR #36 OR #37 OR #38 OR #39

#41 #31 AND #40

#42 'chemoradiotherapy'/exp

#43 'chemoradiotherapies':ab,ti

#44 'chemoradiotherapy':ab,ti

#45 'radiochemotherapy':ab,ti

#46 'radiochemotherapies':ab,ti

#47 # 42 or #43 OR #44 OR #45 OR #46

#48 'drug therapy'/exp

#49 'chemotherapy':ab,ti

#50 'chemotherapies':ab,ti

#51 'pharmacotherapy':ab,ti

#52 'pharmacotherapies':ab,ti

#53 'drug therapies':ab,ti

#54 'drug therapy':ab,ti

#55 #48 or #49 or #50 OR #51 OR #52 OR #53 OR #54

#56 #47 OR #55

#57 'randomized controlled trial'/exp

#58 'randomized controlled trial':it

#59 'placebo':ab,kw,ti

#60 'randomized':ab,kw,ti

#61 #57 OR #58 OR #59 OR #60

#62 #25 AND #41 AND #56 AND #61

### The Cochrane Library

#1 MeSH descriptor: [Nasopharyngeal Neoplasms] explode all trees

#2 MeSH descriptor: [Nasopharynx] explode all trees

#3 Nasopharynx:ti,ab,kw or Nasopharyngeal:ti,ab,kw or Rhinopharynxes:ti,ab,kw or Rhinopharynges:ti,ab,kw or Rhinopharynx:ti,ab,kw (Word variations have been searched)

#4 Nasopharynges:ti,ab,kw or Nasopharynxes:ti,ab,kw (Word variations have been searched)

#5 MeSH descriptor: [Neoplasms] explode all trees

#6 Neoplasm:ti,ab,kw or Neoplasms:ti,ab,kw or Cancer:ti,ab,kw or Cancers:ti,ab,kw or Tumor:ti,ab,kw (Word variations have been searched)

#7 Tumors:ti,ab,kw or Carcinomas:ti,ab,kw or Carcinoma:ti,ab,kw or Malignancy:ti,ab,kw or Malignancies:ti,ab,kw (Word variations have been searched)

#8 #2 or #3 or #4



#9 #5 or #6 or #7

#10 NPC:ti,ab,kw (Word variations have been searched)

#11 #8 and #9

#12 #1 or #10 or #11

#13 MeSH descriptor: [Radiotherapy] explode all trees

#14 Radiotherapies:ti,ab,kw or Radiotherapy:ti,ab,kw or RT:ti,ab,kw or  
Radiation:ti,ab,kw (Word variations have been searched)

#15 MeSH descriptor: [Radiotherapy, Intensity-Modulated] explode all trees

#16 Intensity-Modulated or Volumetric-Modulated or Volumetric Modulated or  
Intensity-Modulated or Intensity Modulated (Word variations have been searched)

#17 Tomotherapy or Tomotherapies or IMRT (Word variations have been searched)

#18 #13 or #14

#19 #15 or #16 or #17

#20 #18 and #19

#21 MeSH descriptor: [Chemoradiotherapy] explode all trees

#22 Chemoradiotherapies:ti,ab,kw or Chemoradiotherapy:ti,ab,kw or  
Radiochemotherapy:ti,ab,kw or Radiochemotherapies:ti,ab,kw (Word variations have  
been searched)

#23 MeSH descriptor: [Drug Therapy] explode all trees

#24 Chemotherapy:ti,ab,kw or Chemotherapies:ti,ab,kw or Pharmacotherapy:ti,ab,kw or Pharmacotherapies:ti,ab,kw or Drug Therapies:ti,ab,kw (Word variations have been searched)

#25 Drug Therapy:ti,ab,kw (Word variations have been searched)

#26 #21 or #22 or #23 or #24 or #25

#27 #12 and #20 and #26

CNKI, Wanfang, VIP and CBM database (in Chinese)

1. nasopharyngeal cancer (title)
2. chemotherapy (key word, title, abstract)
3. radiotherapy (key word, title, abstract)
4. IMRT (text word)
5. random (text word)
6. 1 and 2 and 3 and 4 and 5

Supplementary figure 1 Funnel plot of the comparison between CCRT and IMRT alone for overall response rate (a) and complete response rate (b).

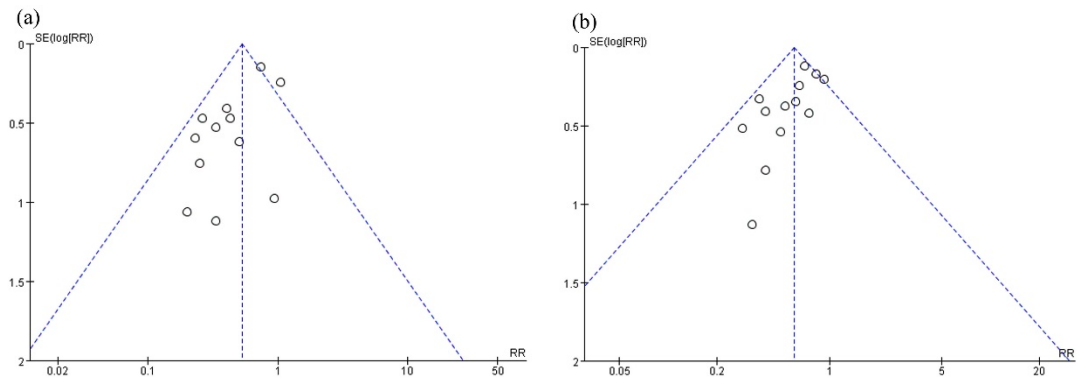

Supplementary figure 2 subgroup forest plot of the comparison between CCRT and IMRT alone for gastrointestinal reaction. (a) no platinum-based concurrent chemotherapy group. (b) cisplatin based concurrent chemotherapy group. (c) nedaplatin based concurrent chemotherapy group.

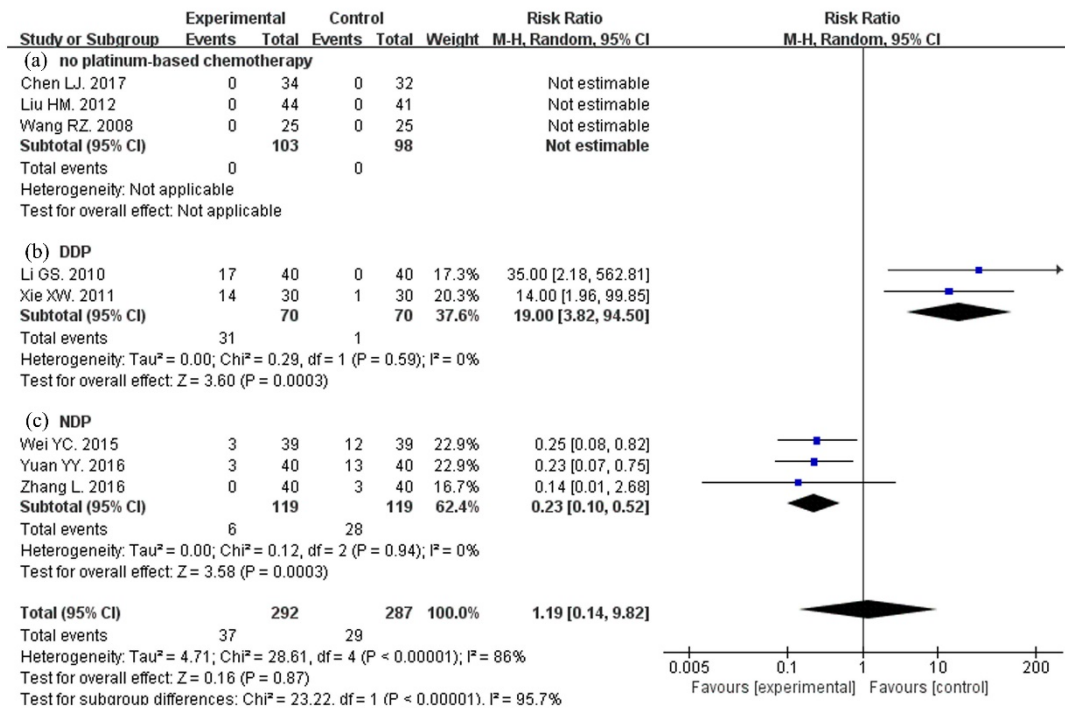

Supplement: Supplementary file 1 [file get_supplementary_file.php%3Ff%3D160469.pdf]
